# Supplementary material
Source: publisher figshare collection journal article supplement (https://gsajournals.figshare.com/ndownloader/files/12776396)
Supplement: Supplementary file 1 [file 12776396]

Table S11. Overlapping peak significance SNP markers in the tested populations
SNP	Consensus Map		LOD
	Chromosome	cM	CB27 x IT82E-18	Sanzi x Vita 7	Mini-core
2_00604	5	11.51152074	24.95139519	60.99613499	6.913925046
2_12036	5	12.5437788	35.90258497	-	11.17098585
2_29558	5	12.5437788	35.90258497	-	10.58785878
2_41383	5	12.88940092	35.90258497	-	2.496209317
2_09160	5	13.80184332	1059.936475	-	4.501689446
2_09161	5	13.23502304	-	1799.551654	0.371938191
2_27749	5	13.23502304	-	1799.551988	0.813523969
2_27750	5	13.23502304	-	1735.195093	0.86518563
2_19309	5	13.58064516	1132.371301	1799.551653	23.32911431
2_23755	5	13.80184332	-	1799.551653	3.167420839
2_23756	5	13.80184332	-	1799.551653	1.721703792
2_19415	5	13.80184332	-	1799.551653	3.404933876
2_19308	5	13.80184332	-	1799.551653	3.429165294
2_17575	5	13.80184332	-	1799.551653	5.986952004
2_17576	5	13.80184332	-	1799.551653	6.04728503
2_00207	5	13.80184332	-	1253.254191	3.670866643
2_00208	5	13.80184332	-	1732.662761	5.887327983
2_21786	5	13.80184332	-	1799.551653	12.26428137
2_21787	5	13.80184332	-	1799.551653	11.79975159
2_49780	5	13.80184332	-	1253.255352	0.812310106
2_40348	5	13.80184332	778.8175922	-	10.38068749
2_15182	5	13.80184332	1132.370057	1799.551653	17.04871106
2_15997	5	13.99078341	1132.371312	89.43811881	7.498037468
2_15996	5	13.99078341	1132.371311	89.43811882	9.609860062
2_21972	5	13.99078341	1072.634722	89.43811881	7.754437983
2_39658	5	14.35483871	46.45585816	-	8.288563977
